# Supplementary material for: Proton-phosphorous connectivities revealed by high-resolution proton-detected solid-state NMR
Source: Royal Society of Chemistry journal article supplement (doi:10.1039/d2cp00616b), 2022-01-01
Supplement: d2cp00616b1.pdf [file d2cp00616b1.pdf]

## *Supporting Materials Section for*

# **Proton-phosphorous connectivities revealed by high-resolution proton-detected solid- state NMR**

Alexander A. Malär<sup>a</sup>, Qiu Sun<sup>b</sup>, Johannes Zehnder<sup>a</sup>, Gerald Kehr<sup>b</sup>, Gerhard Erker<sup>b</sup>, and Thomas Wiegand<sup>a,c,d,\*</sup>

<sup>a</sup>*Physical Chemistry, ETH Zurich, Vladimir-Prelog-Weg 2, 8093 Zurich, Switzerland*

<sup>b</sup>*Organisch-Chemisches Institut, WWU Münster, Corrensstr. 40, 48149 Münster, Germany*

<sup>c</sup>*Max-Planck-Institute for Chemical Energy Conversion, Stiftstr. 34-36, 45470 Mülheim an der Ruhr, Germany (new address)*

<sup>d</sup>*Institute of Technical and Macromolecular Chemistry, RWTH Aachen University, Worringerweg 2, 52074 Aachen, Germany (new address)*

\*Corresponding author: [thomas.wiegand@cec.mpg.de](mailto:thomas.wiegand@cec.mpg.de)

## Supplementary Figures

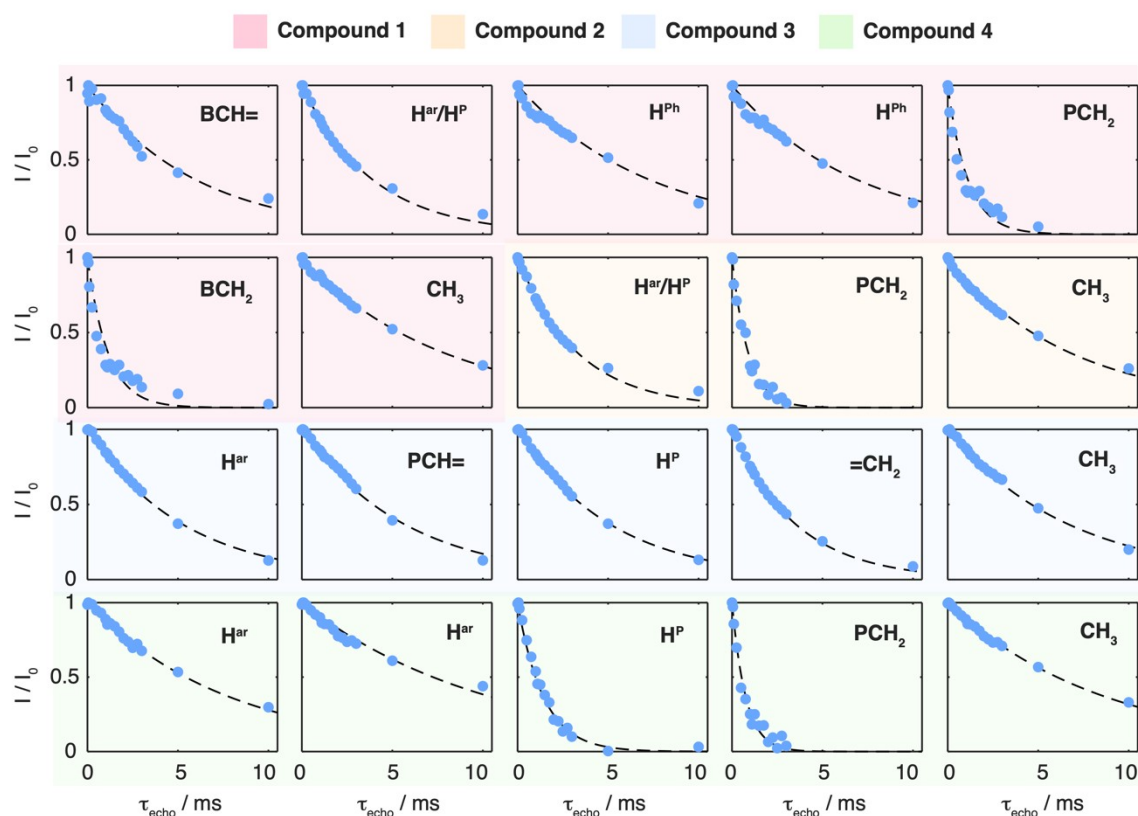

**Figure S1:**  $T_2'$  ( $^1\text{H}$ ) relaxation decay curves for compounds **1-4**, using Hahn-echo relaxation experiments with variable echo time  $\tau_{echo}$ . Dashed lines denote the corresponding mono-exponential fits of the raw data using the functional form  $(A \cdot \exp(-\tau_{echo}/B))$ .

|                  | $\delta_{iso}/\text{ppm}$ | $\Delta^{\text{total}}/\text{Hz}$ | $\Delta^{\text{homo}}/\text{Hz}$ | $\Delta^{\text{inhomo}}/\text{Hz}$ |
|------------------|---------------------------|-----------------------------------|----------------------------------|------------------------------------|
| BCH=             | 8.2                       | 376                               | 53                               | 323                                |
| H <sup>Ph</sup>  | 5.3                       | 289                               | 44                               | 245                                |
| H <sup>Ph</sup>  | 4.1                       | 286                               | 46                               | 240                                |
| PCH <sub>2</sub> | 3.4                       | 320                               | 287                              | 33                                 |

**Table S1:** Summary of site-specific total ( $\Delta^{\text{total}}$ ), homogeneous ( $\Delta^{\text{homo}}$ ) and inhomogeneous ( $\Delta^{\text{inhomo}}$ ) proton linewidths in compound **1** at 100 kHz MAS and 20.0 T. Total linewidths have been obtained by fitting the  $^1\text{H}$ -MAS spectrum with the software dmfit<sup>1</sup>.

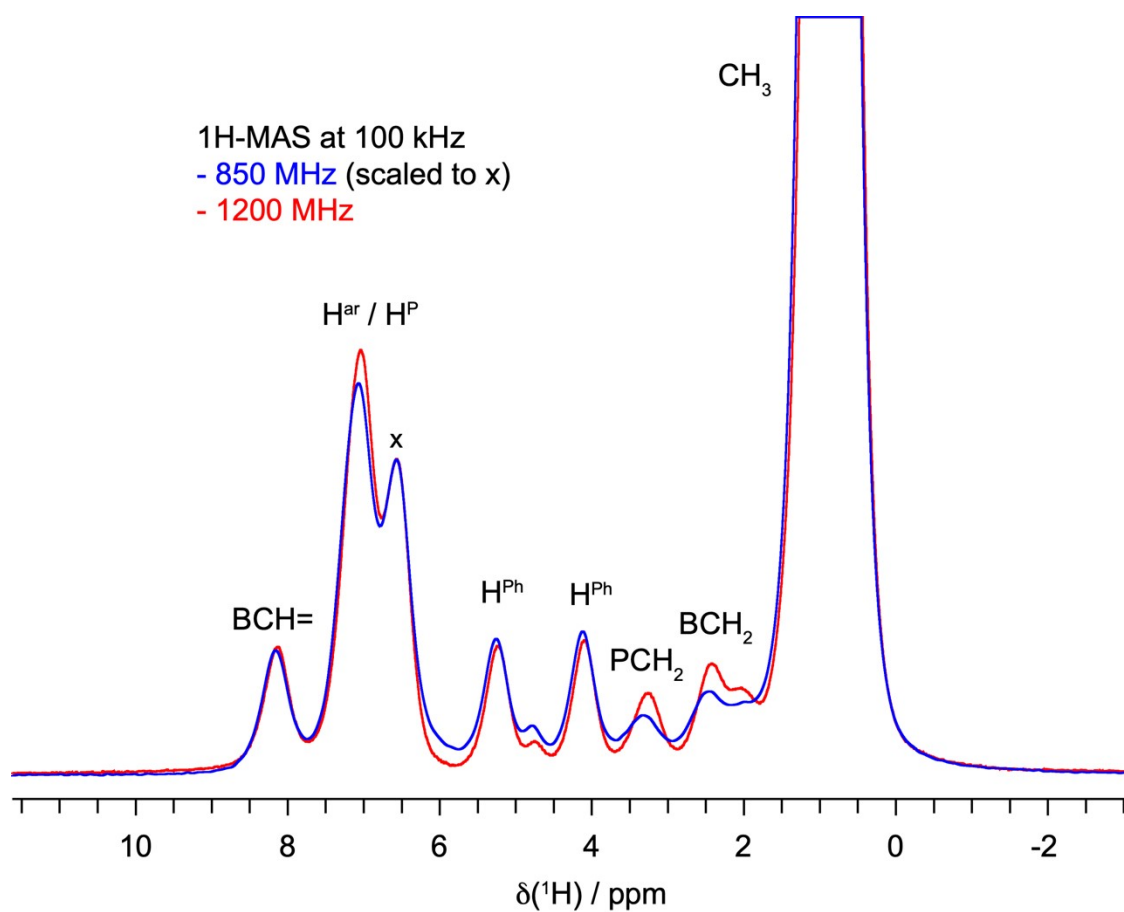

**Figure S2:** Experiments at 1200 MHz on compound **1** indicate that homogeneously broadened resonances ( $\text{PCH}_2$ ,  $\text{BCH}_2$ ) profit the most from the field increase, while the remaining resonances are mainly dominated by inhomogeneous broadening effects.  $^1\text{H}$ -detected MAS spectra recorded with a MAS frequency of 100 kHz at 20.0 T (blue) and 28.2 T (red).

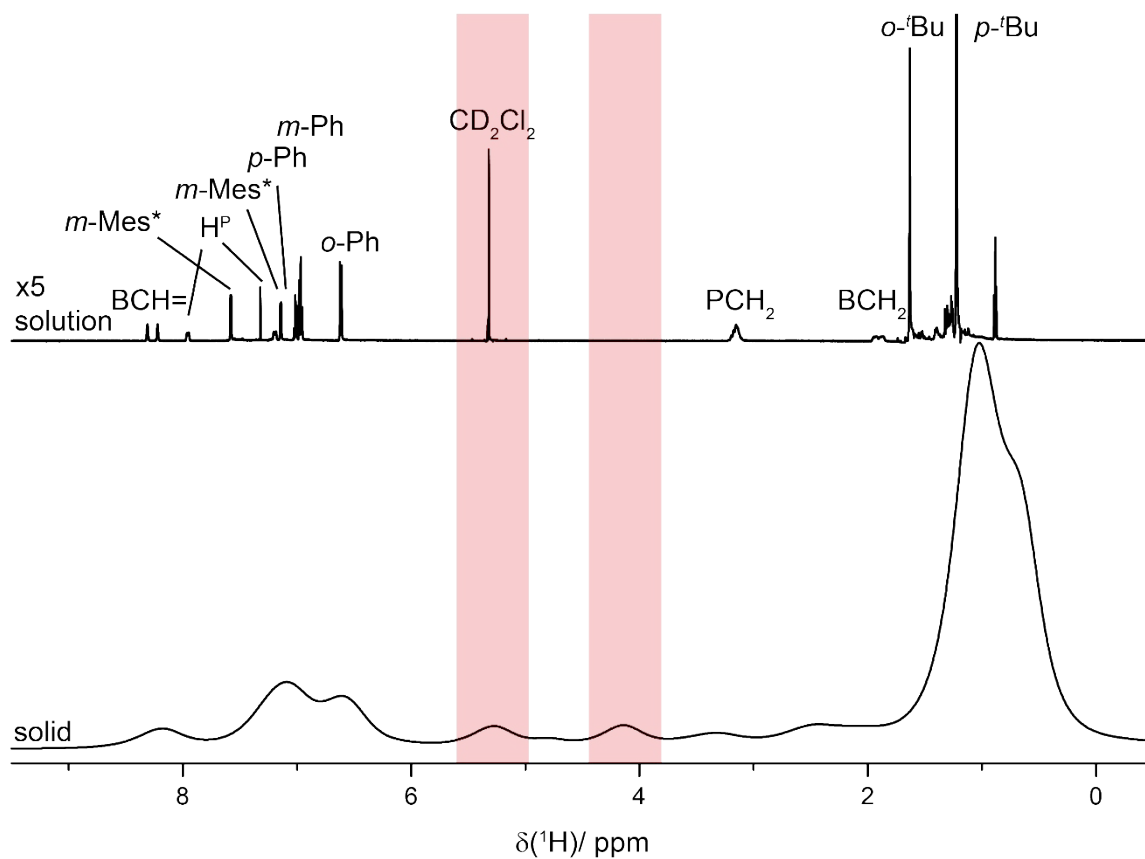

**Figure S3:** Proton chemical-shift differences between solution and solid state. Comparison of  $^1\text{H}$ -detected solution- and solid-state NMR spectra of compound **1** recorded at 14.1 T (solvent  $\text{CD}_2\text{Cl}_2$ , taken from reference <sup>2</sup>) and 20.0 T with a MAS frequency of 100 kHz, respectively. The resonances highlighted in red are shifting to lower frequencies due to intermolecular ring current effects.

Section S1: Ring-current effect calculated by the Johnson-Bovey equation

The Johnson-Bovey equation in e.s.u. units is given as

$$\delta_R \times 10^{-6} = \frac{-ne^2}{6\pi mc^2 a} \cdot \frac{1}{((1+\rho)^2 + z^2)^{0.5}} \cdot \left[ K + \left( \frac{1-\rho^2-z^2}{(1-\rho)^2 + z^2} \right) \cdot E \right] \quad (1)$$

where  $n$  is the number of  $\pi$ -electrons,  $a$  is the ring radius of 1.39 Å,  $e$ ,  $m$  and  $c$  are the standard constants,  $K$  and  $E$  are the first and second complete elliptic integrals, which are a function of the geometric parameters  $\rho$  and  $z$  (Figure S4).  $\rho$  and  $z$  are given in units of  $a$ .

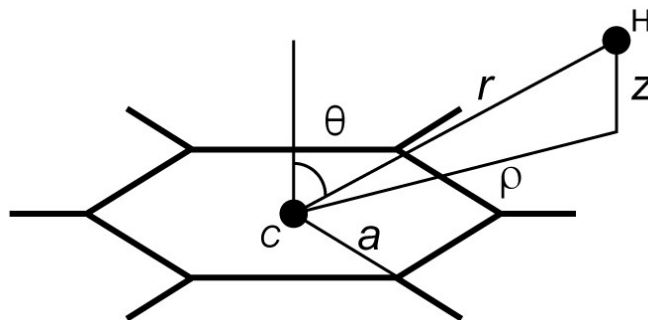

**Figure S4:** Definition of the geometric parameters used in the Johnson-Bovey equation.

The first and second complete elliptic integrals are

$$K(k) = \int_0^{\pi/2} \frac{1}{\sqrt{1 - k^2 \sin^2(\theta)}} d\theta \quad (2)$$

$$E(k) = \int_0^{\pi/2} \sqrt{1 - k^2 \sin^2(\theta)} d\theta \quad (3)$$

where  $\theta$  is the angle between the vector joining the observed proton to the ring center ( $r$ ) and the line perpendicular to the ring plane passing through the ring center  $C$  (Figure S3) and  $k$  is the modulus of the complete elliptic integrals expressed as

$$k = \left[ \frac{4\rho}{(1+\rho)^2 + z^2} \right]^{0.5}. \quad (4)$$

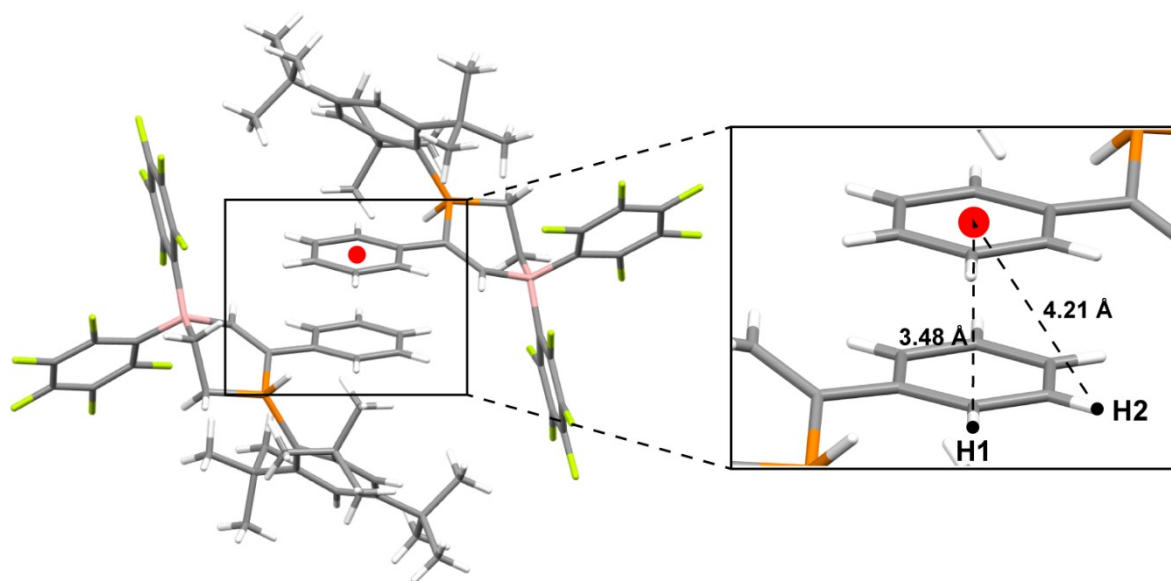

**Figure S5:** Intermolecular ring-current effects explaining the unusual chemical shifts of some phenyl protons in the solid state compared to liquid-state NMR of compound **1**. Intermolecular distances between the phenyl ring protons of one molecule and the centroid position (red sphere) of the partner phenyl ring are shown as black dashed lines.

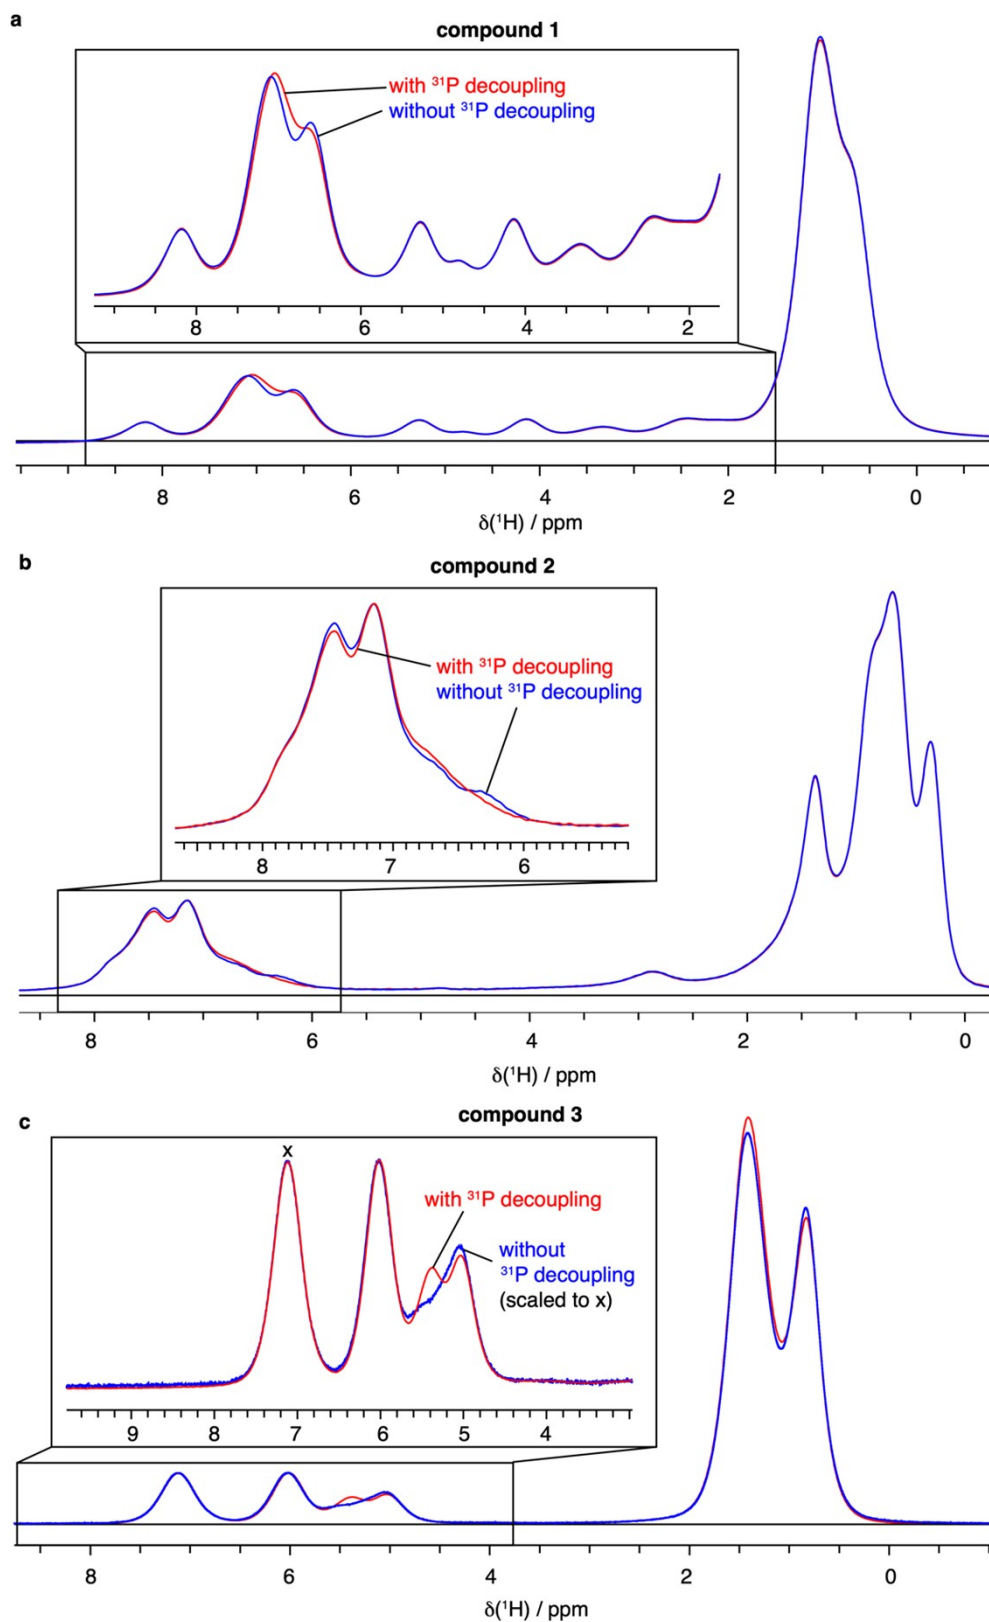

**Figure S6:**  $^1\text{H}$  MAS spectra of **1 a**, **2 b**, **3 c**, recorded at 100 kHz and 20.0 T without  $^{31}\text{P}$  decoupling during acquisition (blue spectrum) and with  $^{31}\text{P}$  decoupling (red spectrum).

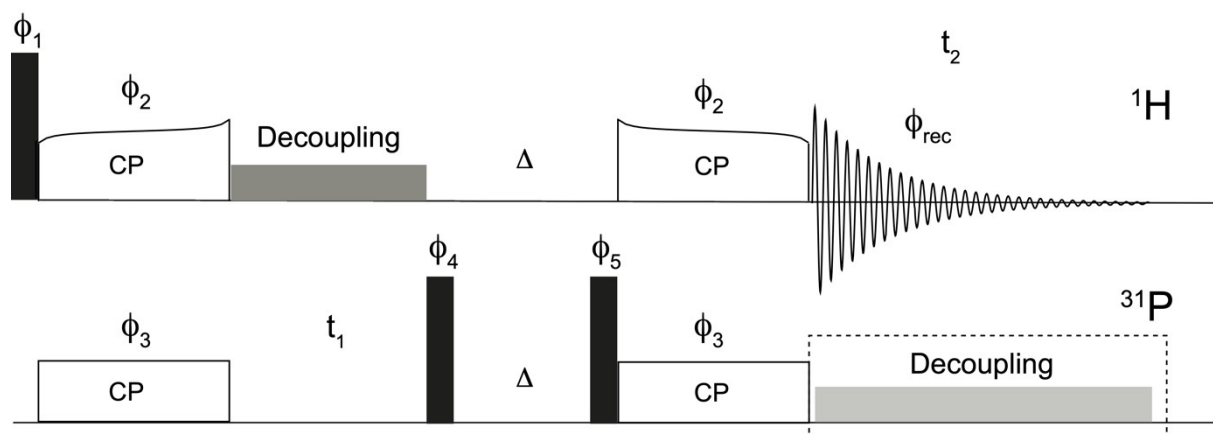

**Figure S7:** CP-hPH pulse sequence used for filtering  $^1\text{H}$ - $^{31}\text{P}$  connectivities. The pulse phase values are given as follows:  $\phi_1 = x x -x -x y y -y -y$ ,  $\phi_2 = y y y y -x -x -x -x$ ,  $\phi_3 = x x -x -x y y -y -y$ ,  $\phi_4 = -y -y y y x x -x -x$ ,  $\phi_5 = y -y -y y -x x x -x$ ,  $\phi_{rec} = x -x -x x y -y -y y$ . Black squares denote  $90^\circ$  hard pulses, adiabatic shapes<sup>3, 4</sup> are applied during CP transfers. The sequence of  $90^\circ$  hard pulses on  $^{31}\text{P}$  have been used for power level optimization and as a z-filter.  $\Delta$  has been set to 5 ms. Low power  $^{31}\text{P}$  decoupling during direct detection can be applied to quench resonance splitting induced by the  $^{31}\text{P}$   $J$  coupling.



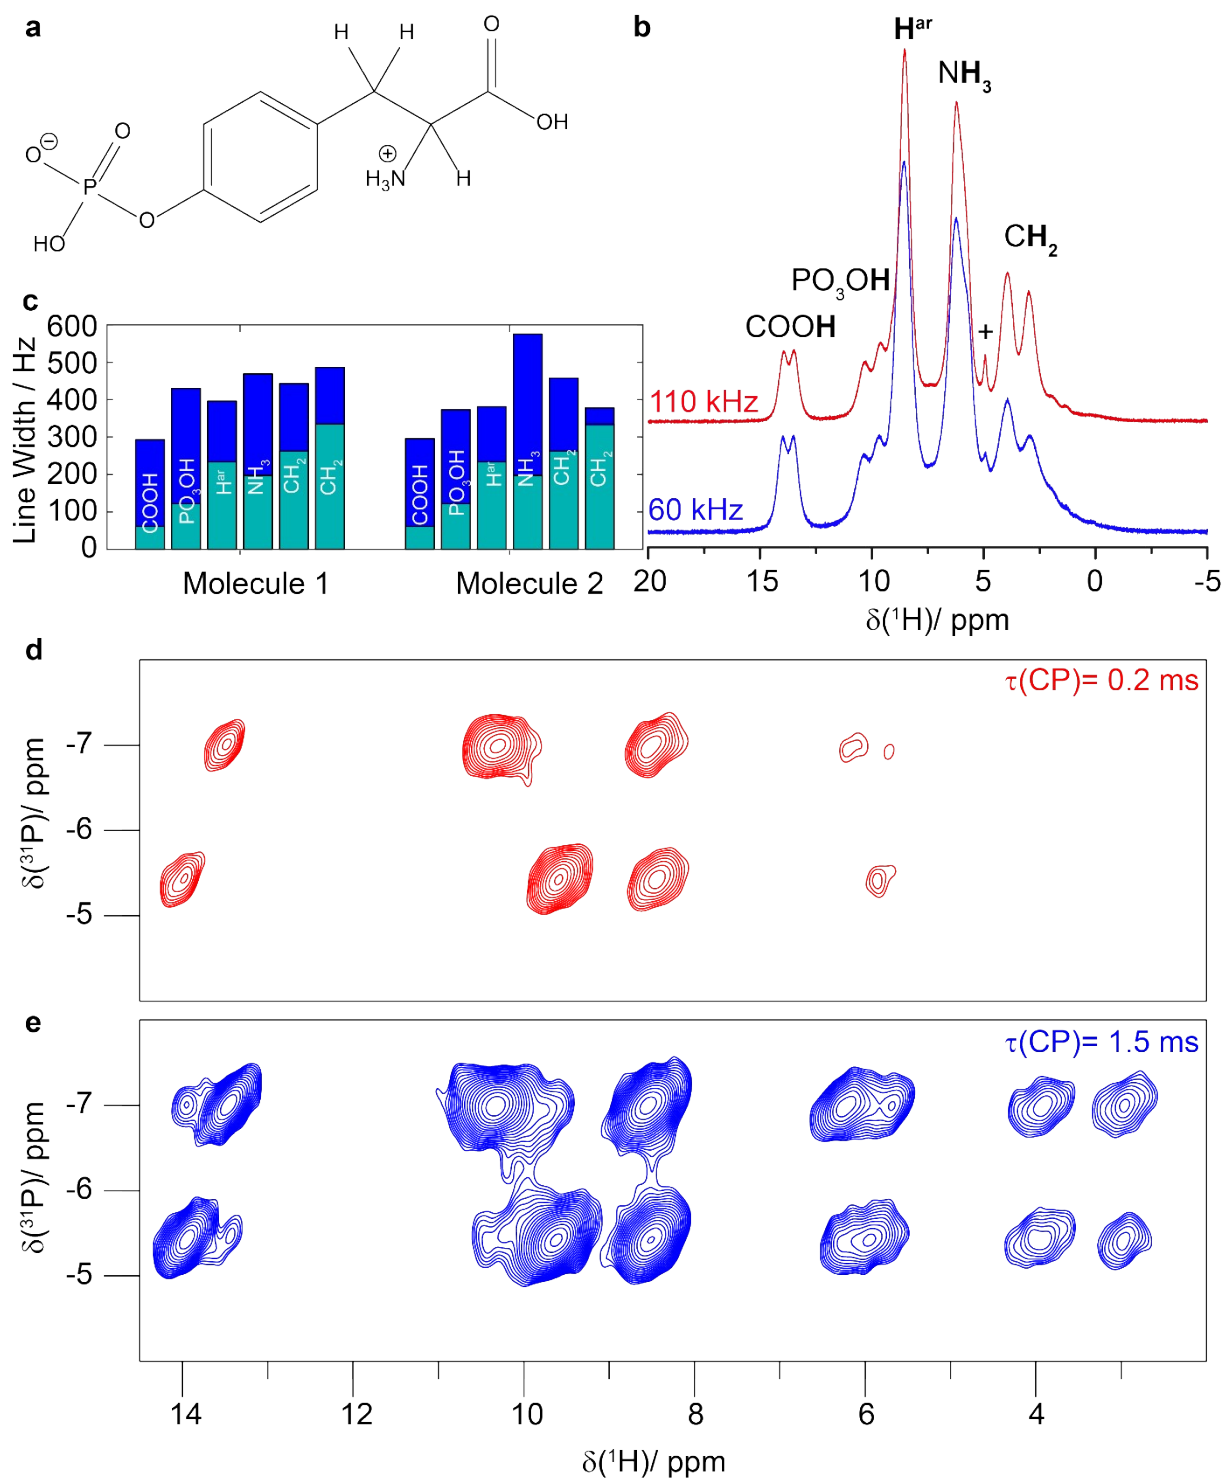

**Figure S8:** Proton-phosphorus spatial proximities probed in *ortho*-phospho-*L*-tyrosine. **a** Chemical structure. **b**  $^1\text{H}$  MAS spectra recorded at a spinning frequency of 60 kHz (blue) and 110 kHz. **c** Homogeneous (cyan) and heterogeneous (blue) proton linewidths determined at a MAS frequency of 105 kHz for the two molecules in the asymmetric unit. hPH correlation spectra recorded with a proton-phosphorus (and vice versa) CP contact time of 0.2 ms (**d**) and 1.5 ms (**e**). The total  $^1\text{H}$  line widths were determined using the 2D spectrum in **e** and the ccpnmr software<sup>5-7</sup>.

*Section S2: <sup>1</sup>H-detected solid-state NMR spectra of ortho-phospho-L-tyrosine*

Figure S8 summarizes the <sup>1</sup>H MAS spectra and the proton line broadening contributions measured at 100 kHz MAS of ortho-phospho-L-tyrosine. In agreement with previous data, some proton resonances, comprising the phosphate -PO<sub>3</sub>OH proton resonance, split into two lines possibly as a consequence of two molecules in the asymmetric unit as observed crystallographically<sup>8</sup>. The corresponding hPH spectra with different CP contact times are also given in Figure S8 and allow for the identification of the set of resonances belonging to one molecule by benefitting from the different <sup>31</sup>P shifts. The hPH spectrum at longer CP contact times (1 ms) indeed confirms that the two molecules are in spatial proximity due to weak cross-peaks between the <sup>31</sup>P and <sup>1</sup>H resonances of the different molecules.

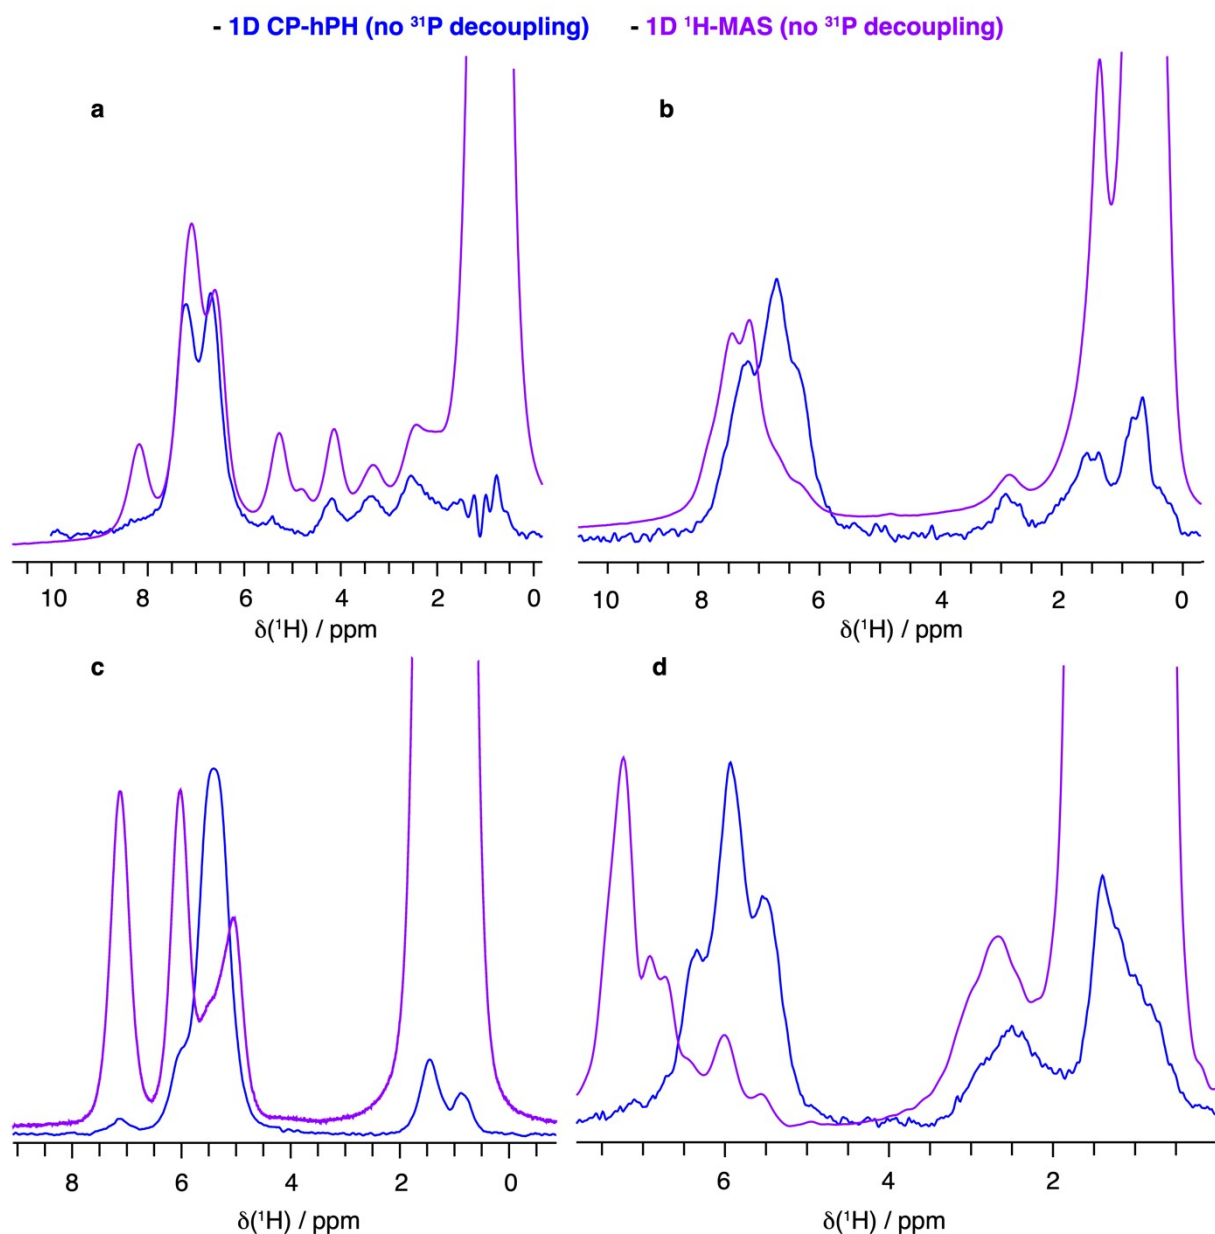

**Figure S9:** *hPH* filtering is essential for resolving overlap issues and precisely probing  $^{31}\text{P}$ - $^1\text{H}$  connectivities. Comparison of  $^1\text{H}$ -MAS spectra (violet) with one-dimensional CP-hPH spectra (blue) without  $^{31}\text{P}$ -decoupling during acquisition for compounds **1(a)**, **2(b)**, **3(c)**, **4(d)** at 100 kHz MAS and 20.0 T.

**Table S2:** Experimental solid-state NMR parameters.

| <b>1D <sup>1</sup>H with/without <sup>31</sup>P decoupling</b> | <b>Compound 1</b> | <b>Compound 2</b> | <b>Compound 3</b> | <b>Compound 4</b> |
|----------------------------------------------------------------|-------------------|-------------------|-------------------|-------------------|
| $\nu_r$ / kHz                                                  | 100               | 100               | 100               | 100               |
| $B_0$ / T                                                      | 20.0              | 20.0              | 20.0              | 20.0              |
| $\nu_1(^1\text{H})$ / kHz                                      | 150               | 150               | 150               | 150               |
| $\nu_{\text{dec}}(^{31}\text{P})$ / kHz                        | Off/5             | Off/5             | Off/5             | Off/-             |
| $t$ increments                                                 | 8192              | 8192              | 8192              | 131072            |
| Sweep width ( $t_2$ )/ ppm                                     | 46.7              | 46.7              | 46.7              | 588               |
| Acquisition time ( $t_2$ )/ ms                                 | 103               | 103               | 103               | 762               |
| Interscan delay/ s                                             | 5                 | 2                 | 2                 | 2                 |
| Number of scans                                                | 32                | 32                | 32                | 128               |
| Measurement time/ min                                          | 2.6               | 1.1               | 1.1               | 4.3               |

**Table S3:** Experimental solid-state NMR parameters (continued).

| <b>2D <sup>1</sup>H-<sup>1</sup>H SD</b> | <b>Compound 1</b> | <b>Compound 2</b> | <b>Compound 3</b> | <b>Compound 4</b> |
|------------------------------------------|-------------------|-------------------|-------------------|-------------------|
| $\nu_r$ / kHz                            | 100               | 100               | 100               | 100               |
| $B_0$ / T                                | 20.0              | 20.0              | 20.0              | 20.0              |
| <b>Transfer I</b>                        | Spin Diffusion    | Spin Diffusion    | Spin Diffusion    | Spin Diffusion    |
| $\nu_1(^1\text{H})$ / kHz                | 150               | 150               | 150               | 150               |
| SD Mixing Time / ms                      | 50                | 50                | 50                | 50                |
| <sup>1</sup> H carrier/ ppm              | 3.2               | 3.2               | 3.2               | 3.1               |
| $t_1$ increments                         | 700               | 700               | 800               | 800               |
| Sweep width ( $t_1$ )/ ppm               | 47                | 47                | 47                | 47                |
| Acquisition time ( $t_1$ )/ ms           | 8.7               | 8.7               | 10                | 10                |
| $t_2$ increments                         | 8192              | 8192              | 8192              | 16384             |
| Sweep width ( $t_2$ )/ ppm               | 46.7              | 46.7              | 46.7              | 117               |
| Acquisition time ( $t_2$ )/ ms           | 103               | 103               | 103               | 82                |
| Interscan delay/ s                       | 2                 | 2                 | 2                 | 2                 |
| Number of scans                          | 16                | 16                | 16                | 16                |
| Measurement time/ h                      | 6.2               | 6.2               | 7.1               | 7.1               |

**Table S4:** Experimental solid-state NMR parameters (continued).

| <b>1D <sup>31</sup>P CP-MAS</b>      | <b>Compound 1</b>      | <b>Compound 2</b>      | <b>Compound 3</b>      | <b>Compound 4</b>      |
|--------------------------------------|------------------------|------------------------|------------------------|------------------------|
| $\nu_r$ / kHz                        | 100                    | 100                    | 100                    | 100                    |
| $B_0$ / T                            | 20.0                   | 20.0                   | 20.0                   | 20.0                   |
| $\nu_1(^1\text{H})$ / kHz            | 150                    | 150                    | 150                    | 150                    |
| $\nu_{\text{dec}}(^1\text{H})$ / kHz | 10                     | 10                     | 10                     | 10                     |
| <b>Transfer I</b>                    | H-P CP (DQ)            | H-P CP (DQ)            | H-P CP (DQ)            | H-P CP (DQ)            |
| $\nu_1(^1\text{H})$ / kHz            | 70                     | 70                     | 71                     | 67                     |
| $\nu_1(^{31}\text{P})$ / kHz         | 20                     | 20                     | 25                     | 28                     |
| Shape                                | Tangent <sup>1</sup> H | Tangent <sup>1</sup> H | Tangent <sup>1</sup> H | Tangent <sup>1</sup> H |
| $t$ increments                       | 8192                   | 8192                   | 8192                   | 8192                   |
| Sweep width / ppm                    | 484                    | 484                    | 242                    | 404                    |
| Acquisition time $t$ / ms            | 24.5                   | 24.5                   | 49.2                   | 24.6                   |
| Interscan delay/ s                   | 2                      | 2                      | 2                      | 5                      |
| Number of scans                      | 512                    | 512                    | 128                    | 2496                   |
| Measurement time/ min                | 17                     | 17                     | 4.2                    | 208                    |

**Table S5:** Experimental solid-state NMR parameters (continued).

| <b>Natural Abundance 2D hCH</b>       | <b>hCH</b>             |
|---------------------------------------|------------------------|
| $\nu_r$ / kHz                         | 100                    |
| $B_0$ / T                             | 28.2                   |
| <b>Transfer I</b>                     | HC-CP (DQ)             |
| $\nu_1(^1\text{H})$ / kHz             | 78                     |
| $\nu_1(^{13}\text{C})$ / kHz          | 22                     |
| CP contact time/ ms                   | 1                      |
| Shape                                 | Tangent <sup>1</sup> H |
| <b>Transfer II</b>                    | CH-CP (DQ)             |
| $\nu_1(^1\text{H})$ / kHz             | 78                     |
| $\nu_1(^{13}\text{C})$ / kHz          | 22                     |
| CP contact time/ ms                   | 1                      |
| Shape                                 | Tangent <sup>1</sup> H |
| <sup>1</sup> H carrier/ ppm           | 4.8                    |
| <sup>13</sup> C carrier/ ppm          | 100                    |
| $t_1$ increments                      | 148                    |
| Sweep width ( $t_1$ ) / ppm           | 200                    |
| Acquisition time ( $t_1$ ) / ms       | 2.5                    |
| $t_2$ increments                      | 32768                  |
| Sweep width ( $t_2$ ) / ppm           | 46.3                   |
| Acquisition time ( $t_2$ ) / ms       | 295                    |
| <sup>13</sup> C decoupling power/ kHz | 5                      |
| Interscan delay/ s                    | 4                      |
| Number of scans                       | 128                    |
| Measurement time/ h                   | 21                     |

**Table S6:** Experimental solid-state NMR parameters (continued).

| <b>2D hPH without/with <sup>31</sup>P decoupling</b> | <b>Compound 1</b>      | <b>Compound 2</b>      | <b>Compound 3</b>      | <b>Compound 4</b>      |
|------------------------------------------------------|------------------------|------------------------|------------------------|------------------------|
| $\nu_r$ / kHz                                        | 100                    | 100                    | 100                    | 100                    |
| $B_0$ / T                                            | 20.0                   | 20.0                   | 20.0                   | 20.0                   |
| <b>Transfer I</b>                                    | HP-CP (DQ)             | HP-CP (DQ)             | HP-CP (DQ)             | HP-CP (DQ)             |
| $\nu_1(^1\text{H})$ / kHz                            | 72                     | 70                     | 71                     | 67                     |
| $\nu_1(^{31}\text{P})$ / kHz                         | 18                     | 21                     | 25                     | 28                     |
| CP contact time/ ms                                  | 2.0                    | 2.0                    | 2.0                    | 2.5                    |
| Shape                                                | Tangent <sup>1</sup> H | Tangent <sup>1</sup> H | Tangent <sup>1</sup> H | Tangent <sup>1</sup> H |
| <b>Transfer II</b>                                   | PH-CP (DQ)             | PH-CP (DQ)             | PH-CP (DQ)             | PH-CP (DQ)             |
| $\nu_1(^1\text{H})$ / kHz                            | 72                     | 70                     | 71                     | 67                     |
| $\nu_1(^{31}\text{P})$ / kHz                         | 18                     | 21                     | 25                     | 28                     |
| CP contact time/ ms                                  | 2.0                    | 2.0                    | 2.0                    | 2.5                    |
| Shape                                                | Tangent <sup>1</sup> H | Tangent <sup>1</sup> H | Tangent <sup>1</sup> H | Tangent <sup>1</sup> H |
| <sup>1</sup> H carrier/ ppm                          | 4.8                    | 4.8                    | 4.8                    | 4.8                    |
| <sup>31</sup> P carrier / ppm                        | -4.8                   | -24                    | -69                    | -8.6                   |
| $t_1$ increments                                     | 256                    | 256                    | 256                    | 256                    |
| Sweep width ( $t_1$ )/ ppm                           | 30                     | 30                     | 30                     | 30                     |
| Acquisition time ( $t_1$ )/ ms                       | 12.4                   | 12.4                   | 12.4                   | 12.4                   |
| $t_2$ increments                                     | 8192                   | 8192                   | 8192                   | 8192                   |
| Sweep width ( $t_2$ )/ ppm                           | 46.7                   | 46.7                   | 46.7                   | 46.7                   |
| Acquisition time ( $t_2$ )/ ms                       | 103                    | 103                    | 103                    | 103                    |
| <sup>31</sup> P WALTZ64 decoupling power/ kHz        | Off/5                  | Off/5                  | Off/5                  | Off/5                  |
| Inter-scan delay/ s                                  | 4                      | 2                      | 2                      | 5                      |
| Number of scans                                      | 16                     | 32                     | 32                     | 32                     |
| Measurement time/ h                                  | 5                      | 5                      | 5                      | 11                     |

## Supplementary References

1. D. Massiot, F. Fayon, M. Capron, I. King, S. Le Calvé, B. Alonso, J.-O. Durand, B. Bujoli, Z. Gan and G. Hoatson, *Magn. Reson. Chem.*, 2002, **40**, 70-76.
2. Q. Sun, C. G. Daniliuc, G. Kehr and G. Erker, *Dalton Transactions*, 2021, **50**, 3523-3528.
3. S. Hediger, B. H. Meier and R. R. Ernst, *Chem. Phys. Lett.*, 1995, **240**, 449-456.
4. S. Hediger, B. H. Meier, N. D. Kurur, G. Bodenhausen and R. R. Ernst, *Chem. Phys. Lett.*, 1994, **223**, 283-288.
5. T. Stevens, R. Fogh, W. Boucher, V. Higman, F. Eisenmenger, B. Bardiaux, B.-J. van Rossum, H. Oschkinat and E. Laue, *J. Biomol. NMR*, 2011, **51**, 437-447.
6. W. F. Vranken, W. Boucher, T. J. Stevens, R. H. Fogh, A. Pajon, M. Llinas, E. L. Ulrich, J. L. Markley, J. Ionides and E. D. Laue, *Proteins: Structure, Function, and Bioinformatics*, 2005, **59**, 687-696.
7. R. Fogh, J. Ionides, E. Ulrich, W. Boucher, W. Vranken, J. P. Linge, M. Habeck, W. Rieping, T. N. Bhat, J. Westbrook, K. Henrick, G. Gilliland, H. Berman, J. Thornton, M. Nilges, J. Markley and E. Laue, *Nat Struct Mol Biol*, 2002, **9**, 416-418.
8. T. Suga, C. Inubushi and N. Okabe, *Acta Crystallographica Section C*, 1998, **54**, 83-85.
